# Supplementary figures and images for: NRF2 activator A-1396076 ameliorates inflammation in autoimmune disease models by inhibiting antigen dependent T cell activation
Source: PubMed Central journal article supplement — J Transl Autoimmun. 2020 Dec 23;4:100079. doi: 10.1016/j.jtauto.2020.100079 (PMC7809192; doi:10.1016/j.jtauto.2020.100079), 2020-12-23

**A**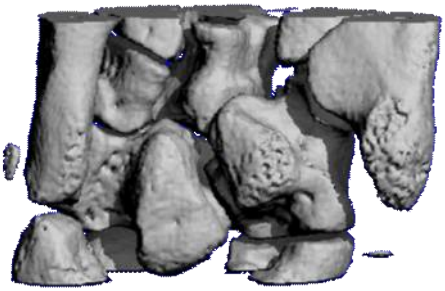**Mineral  
Oil Control**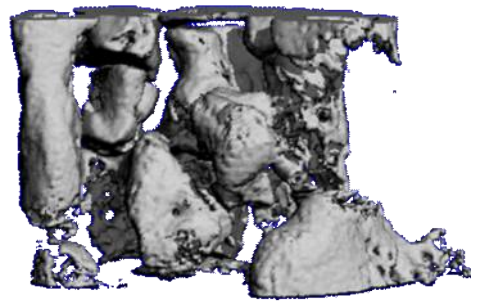**Arthritic  
Control**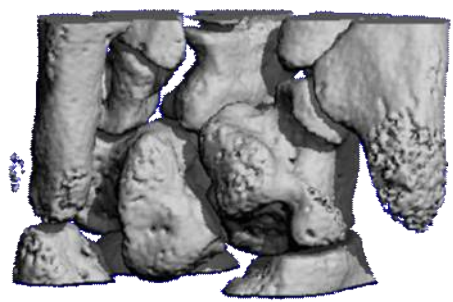**10 mg/kg  
A-1396076****B**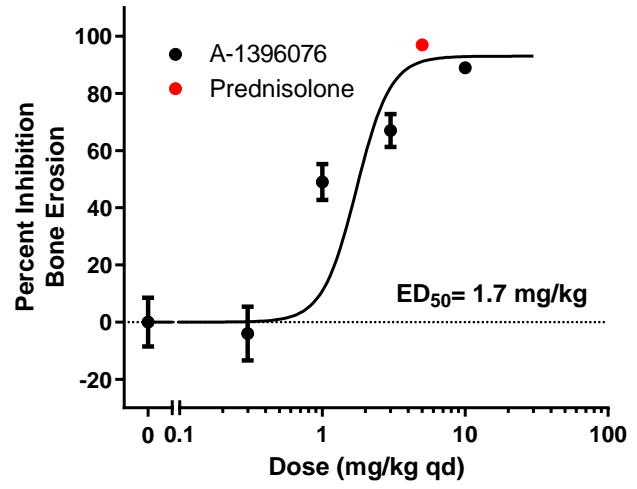

Supplement: mmc1.pdf [file mmc1.pdf]

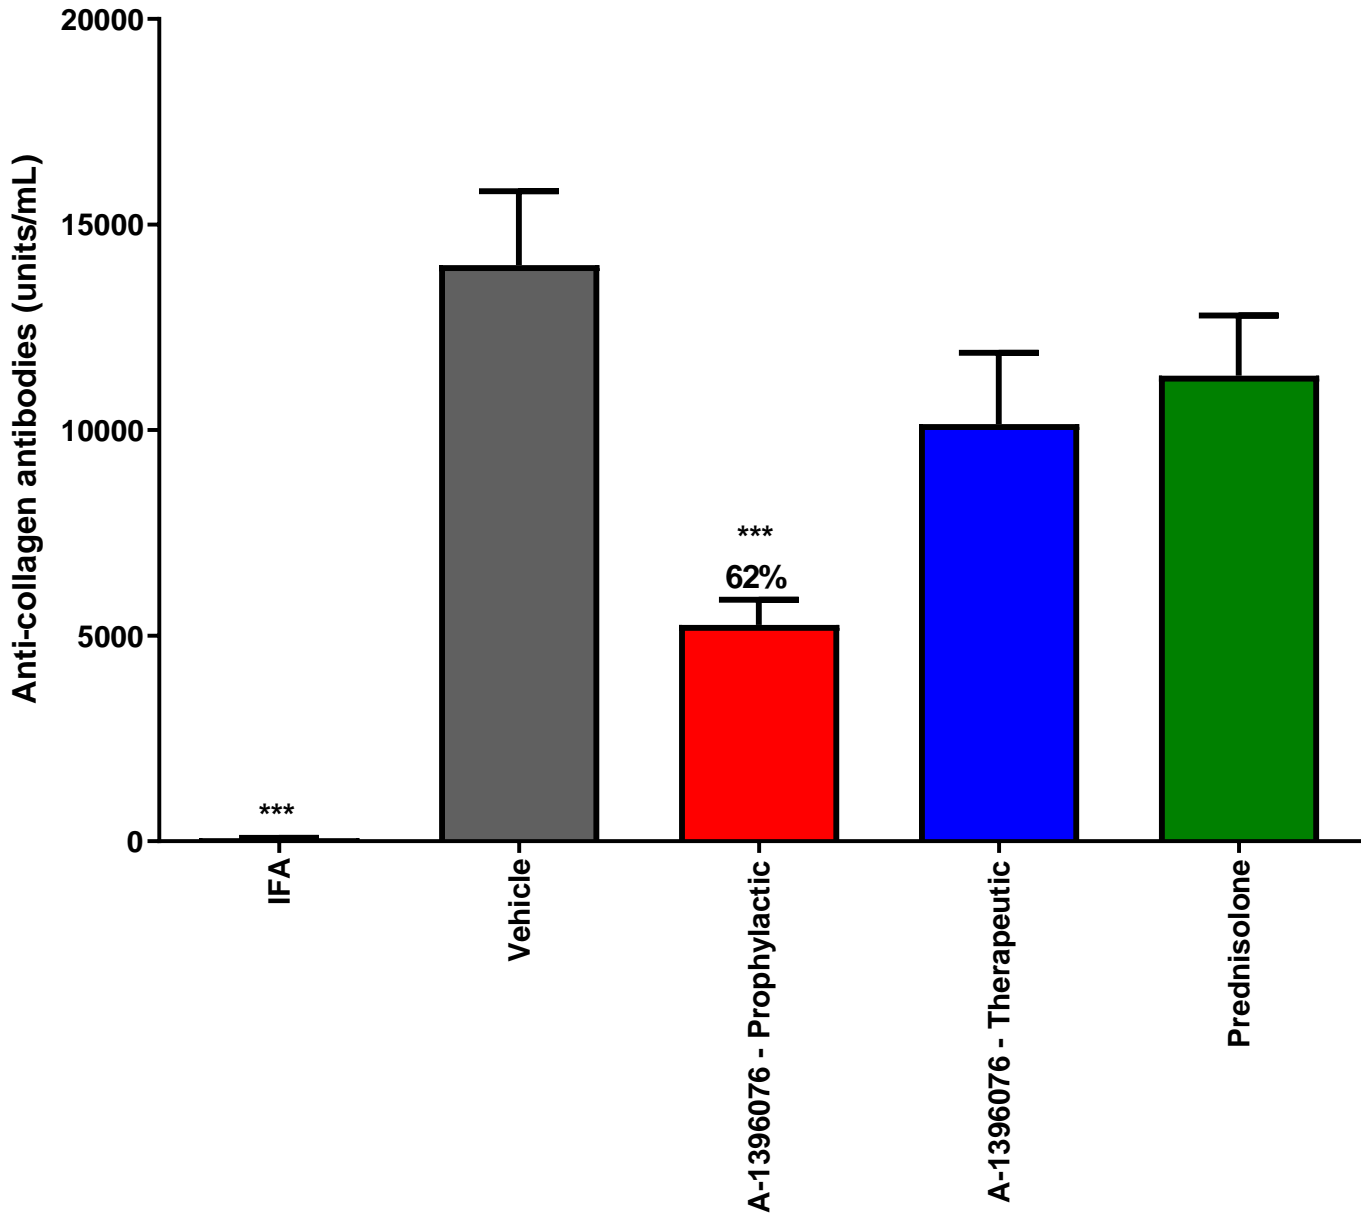

Supplement: mmc2.pdf [file mmc2.pdf]

**A**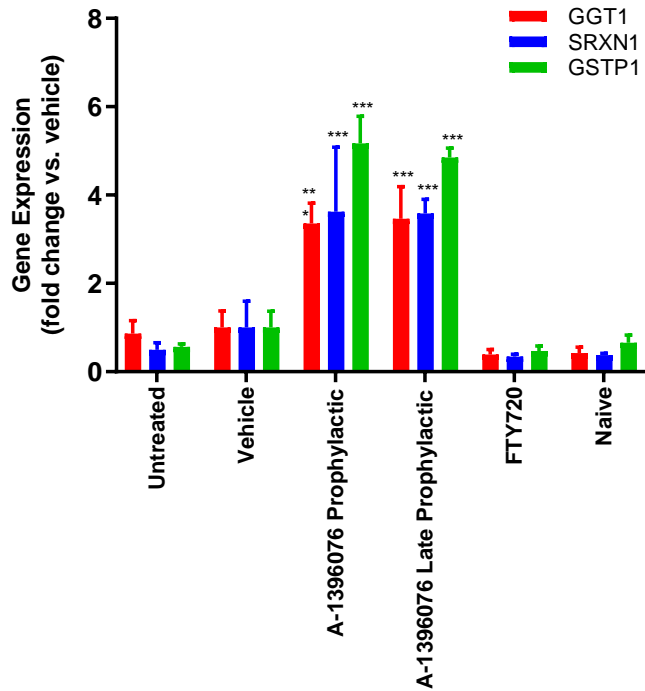**B**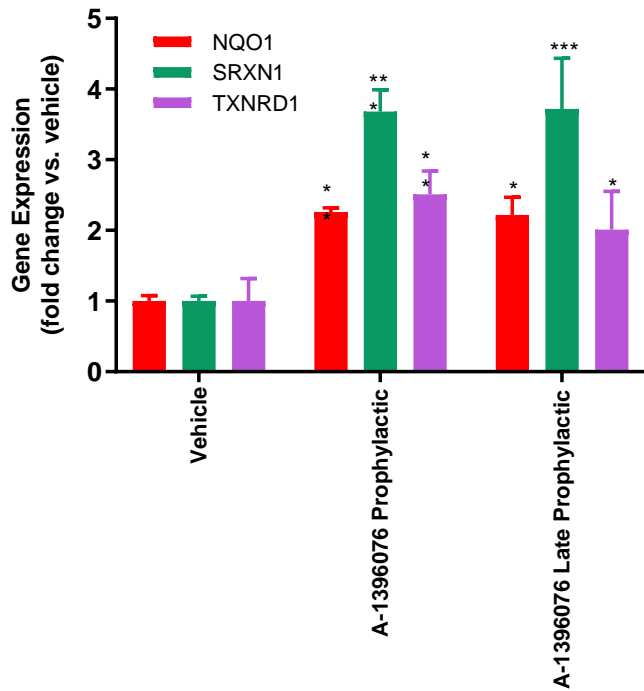

Supplement: mmc3.pdf [file mmc3.pdf]
